# Supplementary material
Source: MDPI journal article supplement (https://www.mdpi.com/2311-7524/10/5/473)
Supplement: s1 [file s1]

## Supplementary material

**Table S1.** Frequency of practices related to carbon sequestration according to yield

| Yield T/ha       |       | Cover cropping |      | Compost application |      | Manure application |      | Residue incorporation |      |
|------------------|-------|----------------|------|---------------------|------|--------------------|------|-----------------------|------|
|                  |       | yes            | no   | Yes                 | No   | Yes                | No   | Yes                   | No   |
| Less than 30     | count | 2              | 13   | 4                   | 11   | 6                  | 9    | 8                     | 7    |
|                  | %     | 66.7           | 48.1 | 66.7                | 45.8 | 31.6               | 81.8 | 40.0                  | 70.0 |
| Between 30 to 40 | Count | 0              | 11   | 1                   | 10   | 9                  | 2    | 8                     | 3    |
|                  | %     | 0              | 40.7 | 16.7                | 41.7 | 47.4               | 18.2 | 40.0                  | 30.0 |
| Between 40 to 50 | Count | 33.3           | 11.1 | 1                   | 3    | 4                  | 0    | 4                     | 0    |
|                  | %     | 2              | 13   | 16.7                | 12.5 | 21.1               | 0    | 20.0                  | 0.0  |

Table S2. Different pesticides used in grapevine cultivation in Sebou Basin area and some toxicological information's

| Active ingredients                            | Category    | CAS RN      | Trade names                 | Chemical families       | WHO Classification | Toxicological information's |             |              |
|-----------------------------------------------|-------------|-------------|-----------------------------|-------------------------|--------------------|-----------------------------|-------------|--------------|
|                                               |             |             |                             |                         |                    | Enviro. Fat                 | Ecotoxicity | Human health |
| Abamectin                                     | Insecticide | 71751-41-2  | ACAGRIM 18EC/GLOBAMEC       | Micro-organism derived  | Ib                 | m                           | h           | h            |
| Acrinathrin                                   | Insecticide | 101007-06-1 | ORYTIS EW 7.5               | Pyrethroid              | U                  | m                           | h           | m            |
| Ametoctradin                                  | Fungicide   | 865318-97-4 | ORVEGO*                     | Triazolopyrimidine      | III                | m                           | h           | m            |
| Argile sulfurée                               | Fungicide   | NA          | MYCO-SIN                    | NA                      | NA                 | -                           | -           | -            |
| Azoxystrobin                                  | Fungicide   | 131860-33-8 | ORTIVA 25 SC/ ALFABET 250SC | Strobilurin             | U                  | h                           | m           | m            |
| Bacillus thuringiensis var. Kurstaki ABTS-351 | Insecticide | 68038-71-1  | DIPEL 8L                    | Micro-organism          | III                | m                           | m           | l            |
| Benalaxyl                                     | Fungicide   | 71626-11-4  | GALBEN M*                   | Acylamino acid          | III                | m                           | m           | m            |
| Boscalid                                      | Fungicide   | 188425-85-6 | COLLIS SC*                  | Carboxamide             | U                  | h                           | m           | m            |
| Chlorpyrifos methyl                           | Insecticide | 5598-13-0   | EXOCIDE 48 EC               | Organophosphate         | III                | m                           | h           | h            |
| Copper hydroxide                              | Fungicide   | 20427-59-2  | BLUE SHIELD                 | Inorganic compound      | II                 | l                           | h           | m            |
| Copper oxychloride                            | Fungicide   | 1332-40-7   | COPRANTOL BLEU/ACROBAT CU*  | Inorganic compound      | II                 | m                           | h           | m            |
| Copper sulfate                                | Fungicide   | 7758-98-7   | SERGOMIL L-60/ COPAS        | Inorganic compound      | II                 | l                           | m           | h            |
| Cyflufenamid                                  | Fungicide   | 180409-60-3 | KAISER 10SC                 | Amide                   | NA                 | m                           | h           | m            |
| Cymoxanil                                     | Fungicide   | 57966-95-7  | AVISO DF*/ EQUATION PRO*    | Cyanoacetamide oxime    | II                 | h                           | m           | h            |
| Cyprodinil                                    | Fungicide   | 121552-61-2 | SWITCH 62.5WG*              | Anilinopyrimidine       | NA                 | m                           | h           | m            |
| Deltamethrin                                  | Insecticide | 52918-63-5  | DECIS FLUXX                 | Pyrethroid              | II                 | h                           | h           | h            |
| Dicofol                                       | Insecticide | 115-32-2    | DICOLTHANE WP/ ARTILA       | Organochloride          | II                 | h                           | h           | h            |
| Difenoconazole                                | Fungicide   | 119446-68-3 | PRIORI TOP*                 | Conazole                | II                 | h                           | h           | m            |
| Dimethomorph                                  | Fungicide   | 110488-70-5 | ORVEGO*                     | Morpholine              | III                | m                           | h           | m            |
| Essence d'orange [d-limonène]                 | Insecticide | 8028-48-6   | LIMOCIDE                    | Plant derived substance | NA                 | -                           | m           | m            |
| Famoxadone                                    | Fungicide   | 131807-57-3 | TITAH*                      | Dicarboximide           | U                  | h                           | h           | m            |
| Fenamidone                                    | Fungicide   | 161326-34-7 | VERITA FLASH*               | Imidazole               | III                | m                           | m           | m            |

|                    |             |             |                              |                        |     |    |    |   |
|--------------------|-------------|-------------|------------------------------|------------------------|-----|----|----|---|
| Fludioxonil        | Fungicide   | 131341-86-1 | SWITCH 62.5WG*               | Phenylpyrrole          | U   | h  | h  | m |
| Fluopicolide       | Fungicide   | 239110-15-7 | PROFILER*                    | Benzamide              | U   | h  | m  | m |
| Folpet             | Fungicide   | 133-07-3    | MIKAL FLASH*                 | Phthalimide            | U   | m  | h  | m |
| Fosetyl-Aluminium  | Fungicide   | 39148-24-8  | ALLUM WG/ VERITA FLASH*      | Organophosphate        | U   | h  | m  | m |
| Glyphosate         | Herbicide   | 1071-83-6   | ROUNDUP TURBO                | Organophosphate        | III | m  | m  | m |
| Hexaconazole       | Fungicide   | 79983-71-4  | ORSALIS 5% SC/ HEXA5 SC      | Triazole               | III | h  | m  | h |
|                    | Pesticide   | 64741-89-5  | SPRAY OIL 7 E/ OVIPRON 78EC  | Unclassified           | NA  | h  | na | h |
| Imidacloprid       | Insecticide | 138261-41-3 | BRIGHT SC*                   | Neonicotinoid          | II  | h  | h  | h |
| Indoxacarb         | Insecticide | 173584-44-6 | AVAUNT 150 EC                | Oxadiazine             | II  | h  | h  | h |
| Iprodione          | Fungicide   | 36734-19-7  | IPROSS 480SC                 | Dicarboximide          | III | m  | m  | h |
| Kresoxim-methyl    | Fungicide   | 143390-89-0 | ALLIAGE/ COLLIS SC*          | Strobilurin            | III | h  | m  | h |
| Lambda cyhalothrin | Insecticide | 91465-08-6  | KARATE 5 EC/ KARIS 10SC      | Pyrethroid             | II  | h  | h  | h |
| Malathion          | Insectide   | 121-75-5    | MALYPHOS 50/ MALAPRON        | Organophosphate        | III | m  | h  | h |
| Mancozeb           | Fungicide   | 0818-01-7   | FORTUNA BLEUE 80 WP/ KEM-TAN | Carbamate              | U   | h  | h  | h |
| Mandipropamid      | Fungicide   | 374726-62-2 | REVUS 250                    | Amide                  | U   | m  | m  | m |
| Maneb              | Fungicide   | 12427-38-2  | MOLOSS M*/ MANAGRI           | Carbamate              | U   | m  | h  | h |
| Meptyldinocap      | Fungicide   | 131-72-6    | KARATHANE 3D                 | Dinitrophenol          | III | m  | h  | h |
| Metalaxyl          | Fungicide   | 57837-19-1  | RIDOMIL GOLD R WG*           | Anilide                | II  | m  | m  | m |
| Methomyl           | Insecticide | 16752-77-5  | SALVADOR 25WP                | Carbamate              | Ib  | h  | h  | h |
| Metiram            | Fungicide   | 9006-42-2   | AVISO DF*                    | Carbamate              | U   | m  | h  | m |
| Myclobutanil       | Fungicide   | 88671-89-0  | MIRACLE                      | Triazole               | II  | m  | m  | h |
| Oxyfluorfen        | Herbicide   | 42874-03-3  | GOAL460SC                    | Nitrophenol ether      | U   | m  | h  | h |
| Penconazole        | Fungicide   | 66246-88-6  | TOPENCO 100 EC               | Triazole               | III | h  | m  | h |
| Propineb           | Fungicide   | 12071-83-9  | ANTRACOL 70 WP               | Carbamate              | U   | na | h  | m |
| Pyraclostrobin     | Fungicide   | 175013-18-0 | PRISTINE*/ CABRIO DUO        | Strobilurin            | NA  | h  | h  | h |
| Pyriproxyfen       | Insecticide | 95737-68-1  | ADMIRAL 10 EC                | Juvenile hormone mimic | U   | m  | h  | m |
| Pythium oligandrum | Fungicide   | NA          | POLYVERSUM                   | Micro-organism         | NA  | -  | l  | l |

|                     |             |             |                              |                    |     |   |   |   |
|---------------------|-------------|-------------|------------------------------|--------------------|-----|---|---|---|
| Sulphur             | Fungicide   | 7704-34-9   | AZUMO MG/ MICROTHIOL SPECIAL | Inorganic compound | III | m | h | l |
| Spirotetramat       | Insecticide | 203313-25-1 | MOVENTO 100 SC               | Tetramic acid      | III | m | m | h |
| Sulfoxaflor         | Insecticide | 946578-00-3 | CLOSER 240 SC                | Sulfoximine        | II  | h | h | m |
| Tau-fluvalinate     | Insecticide | 102851-06-9 | MAVRIK 2F                    | Pyrethroid         | III | m | h | h |
| Tebuconazole        | Fungicide   | 107534-96-3 | MATIZ 250 EW                 | Triazole           | II  | m | h | h |
| Tetraconazole       | Fungicide   | 112281-77-3 | EMERALD 125                  | Triazole           | II  | h | m | m |
| Thiophanate-methyle | Fungicide   | 23564-05-8  | PELT 44/ PELT 70 WDG         | Carbamate          | U   | m | h | h |
| Triadimenol         | Fungicide   | 55219-65-3  | MATADOR 300 EC*              | Triazole           | II  | m | h | h |
| Trifloxystrobin     | Fungicide   | 141517-21-7 | FLINT 50WG                   | Strobilurin        | U   | m | h | h |
| Nbr of A. I.: 58    |             |             | Nbr of C. F.: 31             |                    |     |   |   |   |

Ia: Extremely hazardous, Ib: Highly hazardous, II: Moderately hazardous, III: Slightly hazardous, U: Unlikely to present acute hazard in normal use, A.I.: Active ingredient, C.F.: chemical families, l: Low alert, m:

Medium alert, h: Hight alert.

Table S3. Regression analysis of grapevine yield on number of pesticide application

| Coefficient <sup>A</sup>      |       |            |      |               |
|-------------------------------|-------|------------|------|---------------|
| Model                         |       |            |      |               |
|                               | B     | Std. Error | Beta | t      Sig.   |
| (Constant)                    | 0.140 | 3.392      |      | -0.41   0.967 |
| Nbr. Of pesticides treatments | 1.029 | .126       | .839 | 8.175   0.000 |

A. Dependent Variable: Yield in t/ha, t : t-test. B-Unstandardized Coefficients, Beta-Standardized Coefficients.

Table S4. EIQ values of pesticides in Sebou Basin vineyards.

| (Farm Worker+ Consumer+ Ecological)/3 C(DT*5) +C(DT*P) C*((S+P)/2) *SY)+L (Fish)+(Bird) +(Bee)+ (Beneficial) |                             |             |           |             |          |         |
|--------------------------------------------------------------------------------------------------------------|-----------------------------|-------------|-----------|-------------|----------|---------|
| CAS Number                                                                                                   | Common Name                 | Action      | EIQ Value | Farm Worker | Consumer | Ecology |
| 71751-41-2                                                                                                   | abamectin                   | I           | 34.68     | 13.80       | 3.90     | 86.35   |
| 101007-06-1                                                                                                  | acrinathrin                 | I           | 25.33     | 6.00        | 2.00     | 68.00   |
| 865318-97-4                                                                                                  | ametoctradin                | F           | 16.67     | 6.00        | 2.00     | 42.00   |
| 131860-33-8                                                                                                  | azoxystrobin                | F           | 26.92     | 8.10        | 6.05     | 66.62   |
| 68038-71-1                                                                                                   | bacillus thuringiensis      | I           | 13.33     | 6.90        | 2.45     | 30.63   |
| 71626-11-4                                                                                                   | benalaxyl                   | F           | 16        | 9           | 10       | 29      |
| 188425-85-6                                                                                                  | boscalid                    | F           | 26.44     | 12.15       | 21.23    | 45.95   |
| 5598-13-0                                                                                                    | chlorpyrifos-methyl         | I           | 36.71     | 10.35       | 4.15     | 95.62   |
| 20427-59-2                                                                                                   | copper hydroxide            | F           | 33.20     | 24.30       | 9.05     | 66.25   |
| 1317-39-1                                                                                                    | copper oxide                | <u>E, I</u> | 62.00     | 15          | 11       | 160.00  |
| 1332-40-7                                                                                                    | copper oxychloride          | F           | 29.80     | 8.10        | 5.05     | 76.25   |
| 12527-76-3                                                                                                   | copper sulfate              | F           | 61.90     | 24.30       | 13.15    | 148.25  |
| 7758-99-8                                                                                                    | copper sulfate pentahydrate | F           | 69.83     | 25.00       | 15.50    | 144.00  |
| 8011-63-0                                                                                                    | copper sulfate+lime         | F           | 67.67     | 108.00      | 19.00    | 76.00   |
| 180409-60-3                                                                                                  | cyflufenamid                | <u>E</u>    | 16.50     | 6           | 7        | 36.50   |
| 57966-95-7                                                                                                   | cymoxanil                   | F           | 35.48     | 21.87       | 21.61    | 62.95   |
| 121552-61-2                                                                                                  | cyprodinil                  | F           | 26.77     | 12.15       | 14.73    | 53.45   |
| 52918-63-5                                                                                                   | deltamethrin                | I           | 28.38     | 18.00       | 2.00     | 65.15   |
| 115-32-2                                                                                                     | dicofol                     | I           | 29.92     | 10.35       | 4.68     | 74.72   |
| 119446-68-3                                                                                                  | difenoconazole              | F           | 22.00     | 8.00        | 10.00    | 48.00   |
| 110488-70-5                                                                                                  | dimethomorph                | F           | 14.00     | 6.00        | 7.00     | 29.00   |
| 131807-57-3                                                                                                  | famoxadone                  | F           | 10.36     | 9.00        | 2.50     | 19.59   |
| 161326-34-7                                                                                                  | fenamidone                  | F           | 18.29     | 6.90        | 7.35     | 40.63   |
| 131341-86-1                                                                                                  | fludioxonil                 | F           | 23.87     | 8.10        | 3.05     | 60.45   |
| 239110-15-7                                                                                                  | fluopicolide                | F           | 26.00     | 14.00       | 15.00    | 38.00   |
| 0133-07-03                                                                                                   | folpet                      | F           | 31.73     | 12.15       | 6.08     | 76.95   |
| 39148-24-8                                                                                                   | fosetyl-aluminium           | F           | 12.00     | 6.00        | 4.00     | 26.00   |
| 38641-94-0                                                                                                   | Glyphosate-isopropylamine   | H           | 20.75     | 20          | 7.25     | 35.00   |

|             |                    |                 |       |       |       |        |
|-------------|--------------------|-----------------|-------|-------|-------|--------|
| 79983-71-4  | hexaconazole       | F               | 52.33 | 60    | 46    | 51     |
| 138261-41-3 | imidacloprid       | I               | 36.71 | 6.90  | 10.35 | 92.88  |
| 144171-61-9 | indoxacarb         | I               | 31.19 | 6.90  | 2.45  | 84.22  |
| 36734-19-7  | iprodione          | F               | 24.25 | 16.20 | 9.10  | 47.45  |
| 143390-89-0 | kresoxim-methyl    | F               | 15.07 | 9.00  | 4.50  | 31.70  |
| 91465-08-06 | lambda-cyhalothrin | I               | 44.17 | 20.70 | 3.45  | 108.35 |
| 121-75-5    | malathion          | I               | 23.83 | 9.00  | 4.50  | 58.00  |
| 8018-01-07  | mancozeb           | F               | 25.72 | 20.25 | 8.13  | 48.79  |
| 374726-62-2 | mandipropamid      | F               | 27.14 | 21.87 | 19.61 | 39.95  |
| 12427-38-2  | maneb              | F               | 21.43 | 21.00 | 10.00 | 33.30  |
| 131-72-6    | meptyldinocap      | F               | 20    | 6     | 2     | 52     |
| 57837-19-1  | metalaxyl          | F               | 13.17 | 6     | 9     | 24.50  |
| 70630-17-0  | metalaxyl-m        | F               | 19.07 | 8.10  | 12.15 | 36.95  |
| 16752-77-5  | methomyl           | I               | 22.00 | 6.00  | 11.00 | 49.00  |
| 88671-89-0  | myclobutanil       | F               | 24.01 | 8.10  | 12.15 | 51.79  |
| 42874-03-03 | oxyfluorfen        | H               | 33.82 | 12.00 | 7.00  | 82.45  |
| 8012-95-1   | paraffinic oil     | Ac, I, Adjuvant | 20,17 | 20.00 | 7.50  | 33.00  |
| 66246-88-6  | penconazole        | F               | 23,33 | 12.00 | 13.00 | 45.00  |
| 12071-83-9  | propineb           | F               | 16.90 | 9.00  | 2.50  | 39.20  |
| 175013-18-0 | pyraclostrobin     | F               | 27.01 | 8.10  | 4.05  | 68.87  |
| 95737-68-1  | pyriproxyfen       | I, IGR          | 14.67 | 6.00  | 2.00  | 36.00  |
| 203313-25-1 | spirotetramat      | I               | 35.29 | 13.11 | 5.99  | 86.77  |
| 946578-00-3 | sulfoxaflor        | I               | 18.83 | 15.00 | 12.50 | 29.00  |
| 7704-34-9   | sulfur             | F               | 32.66 | 21.87 | 8.29  | 67.82  |
| 102851-06-9 | tau-fluvalinate    | i               | 23.17 | 12    | 3     | 54.50  |
| 107534-96-3 | tebuconazole       | F               | 40.33 | 20.00 | 31.00 | 70.00  |
| 112181-77-3 | tetraconazole      | F               | 29.00 | 12.00 | 21.00 | 29.00  |
| 23564-05-08 | thiophanate-methyl | F               | 23.82 | 16.20 | 15.30 | 39.95  |
| 55219-65-3  | triadimenol        | F               | 24.82 | 16.20 | 21.30 | 36.95  |

|             |                 |   |       |       |       |       |
|-------------|-----------------|---|-------|-------|-------|-------|
| 141517-21-7 | trifloxystrobin | F | 29,78 | 12,15 | 10,23 | 66,95 |
|-------------|-----------------|---|-------|-------|-------|-------|

DT: Acute dermal toxicity, L: Leaching potential, S: Soil residue half life, SY: Mode of action, C: Chronic health effects, P: Plant surface health effects. IGR: insect growth regulator, AC: acaricide, I: insecticide, F: fungicide, H: herbicide



**Table S5.** List of the nineteen most used AIs in vineyard located in SRB with their biological activity, their physicochemical (Soil half-life, Koc, GUS, Kow, Kh) and toxicological properties (LC<sub>50</sub> for Bees, earthworm and Daphnia, and EC<sub>50</sub> for Algae (PPDB, 2018; NCBI, 2018), and CLP Classification according the EU Pesticides database (EU database, 2019).

| Classification according to the EC Pesticides database (EC database, 2017). |                        |                  |            |                |     |                                     |                                     |                                  |                                    |                                  |                    |                                                                   |
|-----------------------------------------------------------------------------|------------------------|------------------|------------|----------------|-----|-------------------------------------|-------------------------------------|----------------------------------|------------------------------------|----------------------------------|--------------------|-------------------------------------------------------------------|
| Pesticides<br>AI's                                                          | Biological<br>Activity | DT <sub>50</sub> | Koc        | GUS            | Kow | Khf<br>(Pa.<br>m <sup>3</sup> /mol) | LC <sub>50</sub> g Bees<br>(mg/bee) | LC <sub>50</sub> Worm<br>(mg/Kg) | LC <sub>50</sub> Daphnia<br>(mg/L) | EC <sub>50</sub> Algae<br>(mg/L) | CLP Classification |                                                                   |
| Sulphur                                                                     | F                      | 30               | 1950       | -0.7<br>1<br>L | N   | .                                   | 0.05                                | 106.8×10 <sup>-3</sup>           | > 2000                             | > 0.063                          | > 0.063            | Health: H335, H319, H315                                          |
| Copper (I)<br>oxyde                                                         | F                      | 0.1              | 1000       | -1<br>L        | N   | 0.4<br>4                            | .                                   | 12.1×10 <sup>-3</sup>            | > 489.6                            | 0.29                             | 165.9              | Health: H302, H314, H315, H319, H332 /<br>Environment: H400, H410 |
| Mancozeb                                                                    | F                      | 0.05             | 998        | -1.4<br>5<br>L | N   | 2.3                                 | 6.17×10 <sup>-02</sup>              | 0.11                             | >299                               | 0.07                             | 0.04               | Health: H317, H361d/ Environment: H400                            |
| Azoxystrobin                                                                | F                      | 78               | 589        | 3.1<br>L       | L   | 2.5                                 | 7.40×10 <sup>-09</sup>              | 25×10 <sup>-3</sup>              | 283                                | 0.23                             | 0.36               | Health: H331/ Environment: H400, H410                             |
| Lambda<br>cyhalotrin                                                        | I                      | 175              | 2837<br>07 | -2.0<br>9<br>L | N   | 5.5                                 | 2.00×10 <sup>-02</sup>              | 9.1×10 <sup>-4</sup>             | > 500                              | 2.3.10 <sup>-4</sup>             | > 0.005            | Health: H301, H312, H330 / Environment:<br>H400, H410             |
| Boscalid                                                                    | F                      | 484<br>.4        | .          | 2.6<br>8<br>L  | S   | 2.9<br>6                            | 5.18×10 <sup>-05</sup>              | > 0.16                           | > 500                              | 5.33                             | 3.75               | Environment: H400, 410                                            |
| Pyraclostrobin                                                              | F                      | 41.<br>9         | 9304       | 0.0<br>5<br>L  | N   | 3.9<br>9                            | 5.31×10 <sup>-06</sup>              | > 0,11                           | 567                                | 0,016                            | > 0,843            | Health: H315, H331, H335/ Environment:<br>H400, H410              |
| Cymoxanil                                                                   | F                      | 1,7              | .          | 1,4<br>7<br>L  | N   | 0,6<br>7                            | 3,30×10 <sup>-05</sup>              | > 85.3×10 <sup>-3</sup>          | > 1000                             | 27                               | 0.254              | Health: H302, H317, H361fd, H373/<br>Environment: H400, H410      |
| Thiophanate-<br>methyl                                                      | F                      | 0,5              | .          | 0.5<br>L       | N   | 1.4                                 | 1.67×10 <sup>-04</sup>              | 0.11                             | > 13.2                             | 5.4                              | > 25.4             | Health: H317, H332, H340/ Environment:<br>H400, H410              |
| Cyprodinil                                                                  | F                      | 37               | .          | 1.0<br>6<br>L  | N   | 4                                   | 6.60×10 <sup>-03</sup>              | > 0.112                          | 192                                | 0.22                             | 2.6                | Health: H317 / Environment: H400, H410                            |
| Fludioxonil                                                                 | F                      | 164              | 1456<br>00 | -1.3<br>5<br>L | N   | 4.1<br>2                            | 5.40×10 <sup>-05</sup>              | > 0.1                            | >= 1000                            | 0.4                              | 0.024              | Health: H311, H319 / Environment: H400,<br>H410, H412             |
| Penconazole                                                                 | F                      | 117              | .          | 1.2<br>8<br>L  | N   | 3.7<br>2                            | 6.60×10 <sup>-04</sup>              | > 11.2×10 <sup>-3</sup>          | > 331.5                            | 6.75                             | 4.9                | Health: H302, H361d / Environment: H400,<br>H410                  |
| Imidacloprid                                                                | I                      | 191              | .          | 3.6<br>9<br>L  | L   | 0.5<br>7                            | 1.7×10 <sup>-10</sup>               | 3.7×10 <sup>-6</sup>             | 10.7                               | 85                               | > 10               | Health: H302 / Environment: H400, H410                            |
| Maneb                                                                       | F                      | 1                | 2000       | 0.7<br>5<br>L  | N   | -<br>0.4<br>5                       | 2.08×10 <sup>-05</sup>              | > 89.5×10 <sup>-3</sup>          | 840                                | 2.1.10 <sup>-3</sup>             | 0.007              | Health: H317, H319; H332; H361d<br>/Environment: H400, H410       |
| Malathion                                                                   | I                      | 0.1<br>7         | 1800       | 0<br>L         | N   | 2.7<br>5                            | 1.00×10 <sup>-03</sup>              | 0.4×10 <sup>-3</sup>             | 306                                | 7.10 <sup>-4</sup>               | 13                 | Health: H302, H317 / Environment: H400,<br>H410                   |
| Ametoctradin                                                                | F                      | 1.8              | 7713       | 0.5<br>5<br>L  | N   | 4.4                                 | 4.13×10 <sup>-07</sup>              | > 0.111                          | > 1000                             | 44.10 <sup>-3</sup>              | > 0.118            | Health: H302                                                      |
| Dimethomorph                                                                | F                      | 72.<br>7         | .          | 2.2<br>6<br>L  | S   | 2.6<br>8                            | 2.5×10 <sup>-05</sup>               | > 32.4×10 <sup>-3</sup>          | > 500                              | > 20.1                           | 29.2               | Environment: H411                                                 |
| Abamectine                                                                  | I                      | 25               | 5.63<br>8  | 0.2<br>5<br>L  | N   | 4.4                                 | 2.7×10 <sup>-03</sup>               | 1 × 10 <sup>-06</sup>            | 33                                 | 0.00                             | > 1.59             | Environment: H400, H410                                           |

Hexaconazole F 122 1040 2.3 S 3.9 3.33×10<sup>-04</sup> > 0.1 414 > 2.9 > 0.1 Health: H302, H317 / Environment: H411

AI: Insecticide, including acaricide, I: Insecticide, F: Fungicide; H: Herbicide, DT<sub>50</sub>: Half-life in soil (day), Koc: Soil sorption coefficient, GUS: Groundwater ubiquity score, Kow: Partion coefficient, Kh: Henry's constant, LC<sub>50</sub>: Lethal concentration value, NL: Non-Leachable, L: Leachable, SL: Slightly-Leachable, “.”: Unknown.

Table S6. Pesticide ERS calculated using the PERI model for eighteen AI commonly used in SRB vineyards and GUS, Kh, Kow, algae (A), bee (B), daphnia (D) and worm (W) values used in the calculations.

| Active substances  | ERS   | GUS score | Kh score | Kow score | Bscore | Wscore | Dscore | Ascore |
|--------------------|-------|-----------|----------|-----------|--------|--------|--------|--------|
| Hexaconazole       | 5.75  | 4         | 1        | 5         | 4      | 2      | 3      | 5      |
| Imidacloprid       | 5.325 | 5         | 1        | 1         | 5      | 3      | 2      | 3      |
| Azoxystrobin       | 5.375 | 5         | 1        | 1         | 5      | 2      | 4      | 4      |
| Cyprodinil         | 4.625 | 3         | 1        | 5         | 4      | 2      | 4      | 3      |
| Penconazole        | 4.625 | 3         | 1        | 5         | 5      | 2      | 3      | 3      |
| Boscalid           | 4.3   | 4         | 1        | 1         | 4      | 2      | 3      | 3      |
| Dimethomorph       | 4.275 | 4         | 1        | 1         | 5      | 2      | 2      | 2      |
| Abamectine         | 4     | 2         | 1        | 5         | 5      | 3      | 5      | 3      |
| Pyraclostrobin     | 3.875 | 2         | 1        | 5         | 4      | 2      | 5      | 4      |
| Ametoctradin       | 3.75  | 2         | 1        | 5         | 4      | 1      | 5      | 4      |
| Cymoxanil          | 3.3   | 3         | 1        | 1         | 5      | 1      | 2      | 4      |
| Lambda cyhalotrin  | 3.125 | 1         | 1        | 5         | 5      | 2      | 5      | 5      |
| Fludioxonil        | 2.875 | 1         | 1        | 5         | 4      | 2      | 4      | 5      |
| Maneb              | 2.425 | 2         | 1        | 1         | 5      | 2      | 5      | 5      |
| Thiophanate-methyl | 2.3   | 2         | 1        | 1         | 4      | 3      | 3      | 2      |
| Mancozeb           | 1.4   | 1         | 1        | 1         | 4      | 2      | 5      | 5      |
| Malathion          | 1.35  | 1         | 1        | 1         | 5      | 2      | 5      | 2      |
| Cupper (I) oxyde   | 1.3   | 1         | 1        | 1         | 5      | 2      | 4      | 1      |
| Sulphur            | —     | 1         | 1        | .         | 4      | 1      | 5      | 5      |

Table S7. The AIs most commonly used in Sebou bassin, the chemical products, and the correspondent final indicator of ERS

| Active substance   | Commercial products                                       | final ERS |
|--------------------|-----------------------------------------------------------|-----------|
| Hexaconazole       | HEXA 5SC/ ORSALIS 5% SC                                   | 7.6475    |
| Imidacloprid       | BAZOOKA 200/ ADMIRE 200SL/ AKOPRID 200 SL                 | 4.84575   |
|                    | BILAD /BOREY SC/ BRIGHT SC                                | 4.95225   |
| Azoxystrobin       | ORTIVA 25 SC/ ALFABET 250 SC/ AZUR 250SC                  | 5.4825    |
|                    | ZEBRA 320 SC                                              | 4.99875   |
|                    | PRIORI TOP/ SPARTACUS DUO                                 | 6.82625   |
| Cyprodinil         | SWITCH 62,5WG                                             | 4.625     |
|                    | CHORUS 50 WG                                              | 3.9775    |
| Penconazole        | TOPENCO 100 EC/ TOPAS 100EC/ BAYOUD 10 EC                 | 4.5325    |
|                    | TOKRA                                                     | 5.78125   |
| Boscalid           | COLLIS SC/ HEXAGON                                        | 4.472     |
|                    | PRISTINE / BELLIS WG                                      | 4.988     |
| Dimethomorph       | ORVEGO                                                    | 4.14675   |
|                    | ACROBAT CU                                                | 4.595625  |
|                    | CABRIO DUO                                                | 3.6765    |
| Abamectine         | ACAGRIM 18EC/ GLOBAMEC/ ECHELLE 18EC / VERTIMEC           | 2.92      |
| Pyraclostrobin     | CABRIO DUO                                                | 3.3325    |
|                    | PRISTINE / BELLIS WG                                      | 4.495     |
| Ametoctradin       | ORVEGO                                                    | 3.6375    |
| Cymoxanil          | AVISO DF                                                  | 3.3       |
|                    | EQUATION PRO/ TITAH                                       | 3.564     |
|                    | FUNGOMIL 72WP /CYMOMIL 72 WP                              | 1.617     |
| Lambda cyhalotrin  | BILAD /BOREY SC/ BRIGHT SC                                | 2.90625   |
|                    | REEVA 5 EC/ KARATE 5 EC/ OSMOZE                           | 2.25      |
| Fludioxonil        | SWITCH 62,5WG                                             | 2.875     |
| Maneb              | MOLOSS M/ COVAX M                                         | 2.06125   |
|                    | MANEB 80/ MANAGRI                                         | 2.425     |
| Thiophanate-methyl | PELT 44                                                   | 2.3       |
|                    | PELT 70 WDG/ ACTAMYL 70 WP/ THIOGRI 70                    | 1.794     |
| Mancozeb           | MANCOXYDE                                                 | 1.3958    |
|                    | FUNGOMIL 72WP /CYMOMIL 72 WP                              | 0.686     |
|                    | GALBEN M                                                  | 1.75      |
|                    | FORTUNA BLEUE 80 WP/ MANCOTHANE 80/ KEM-TAN/ DITHANE M 45 | 1.162     |

|                  |                                                      |         |
|------------------|------------------------------------------------------|---------|
| Malathion        | SMART 440 EW                                         | 1.24875 |
|                  | POLATHION 50 /MALAPRON/ SIF MALATHION 50/MALYPHOS 50 | 1.2555  |
| Cupper (I) oxyde | RIDOMIL GOLD R WG/ FLARE GOLD                        | 0.884   |
|                  | ACROBAT CU                                           | 1.3975  |

Figures

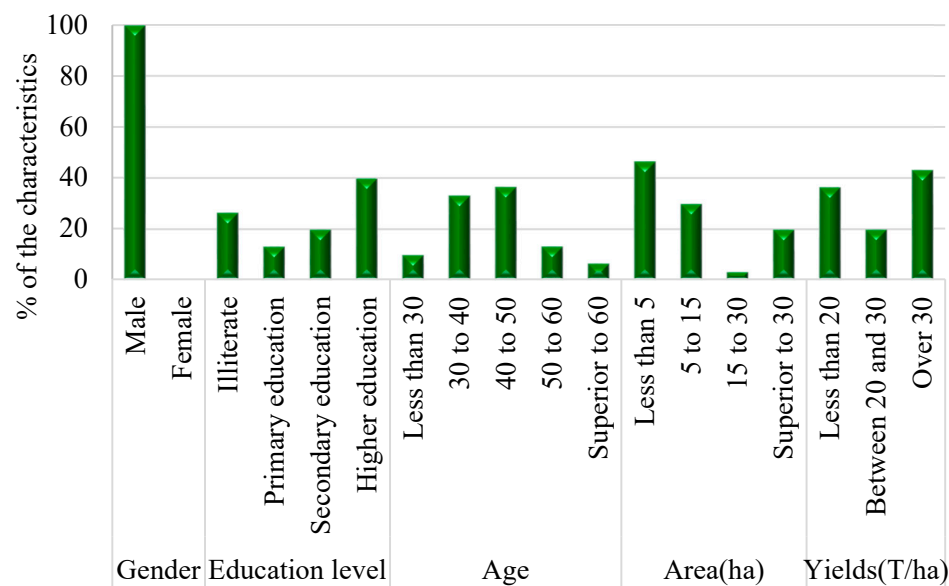

Figure S1. Characteristics of winegrowers and vineyards in region surveyed.

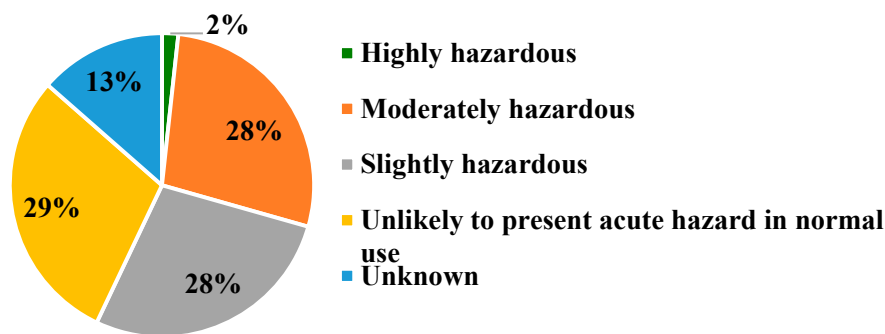

Figure S2. Distribution of chemical families listed according to the WHO classification

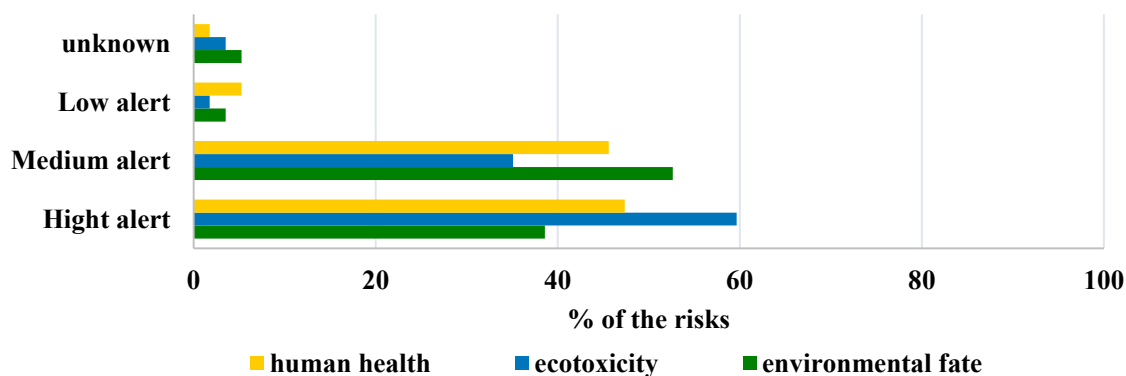

Figure S3. Risks associated with the active ingredients used in the study area according to the Pesticide Properties Database.

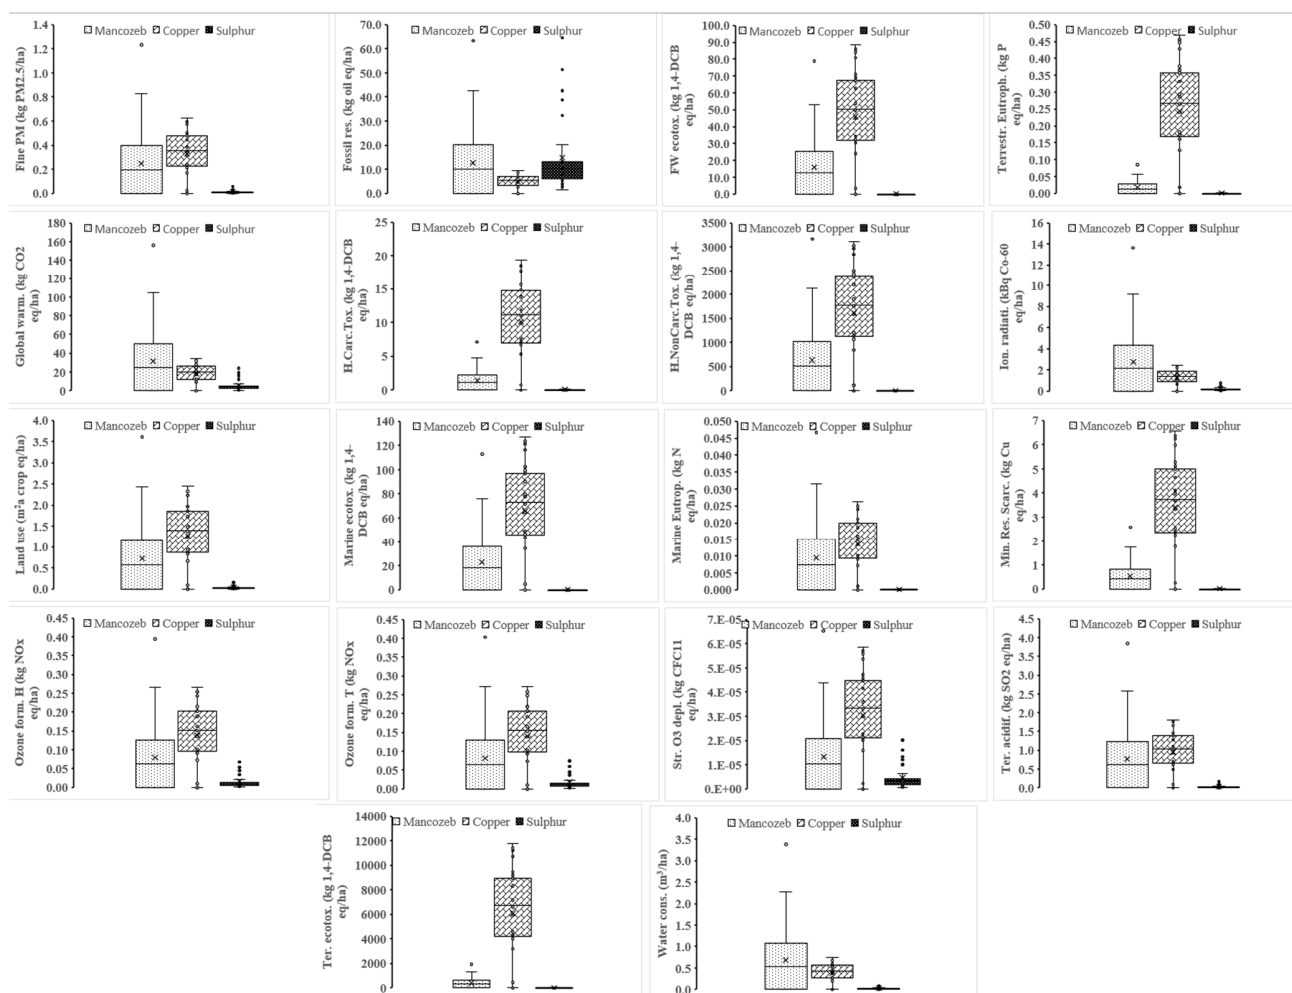

Figure S4. Comparison of the three most commonly used plant protection products
